# Supplementary material for: Valsartan vs. other angiotensin II receptor blockers in the treatment of hypertension: a meta-analytical approach
Source: PubMed Central journal article supplement (PMC2779985; doi:10.1111/j.1742-1241.2009.02028.x), 2009-05
Supplement: ijcp0063-0766-SD1.pdf [file ijcp0063-0766-SD1.pdf]

## Online Supplementary Material: Study Quality Evaluation Sheet.

Highlighted fields apply to this article.

First Author:

Year:

Criteria

Selection Bias (*before* allocation)

*Randomisation*

True: Computer-generated, Random Number Generation,  
Coin Toss (2) Die Toss (3)

Quasi: Alternation, Case record numbers, Birth dates, week  
days

---

*Allocation Concealment*

Adequate: Computer allocation (e.g. central office), On-site  
computer, Pre-coded containers (identical), Serially numbered  
envelopes

Inadequate: Open Methods, non-opaque envelopes, odd/even  
number medical records, DOB, days week, Alternation,  
Unspecified tables, lists, random numbers, sealed envelopes

---

Performance Bias (*during* treatment)

Blinding\*

\*If a study is 'double-blind' it will be assumed  
that the participant and HC provider are blinded.

If the study is said to be 'blinded' we will exclude it.

Participants

HC Provider

Only additional criteria:

Outcome Assessor

Data Analyst

---

Attrition Bias (*after* allocation and inclusion)

Reports withdrawals from trial

Per Protocol Analysis (second choice)

Intention To Treat Analysis (preferred)

---

Detection Bias

Blinding of outcome assessors?

Validity of Outcome Tools (i.e. information on outcome tools)

Selective Outcome Reporting

---

*Study Included*

*Study Excluded*

*Name of Assessor*

*Comment*
